# Supplementary material
Source: PubMed Central journal article supplement (PMC3489092)
Supplement: 97320630008870S1.pdf [file 97320630008870S1.pdf]

## Supplementary material:

**Table 1:** Interactions of the influenza A HA and AVPs derived from the subunit HA1\*

| Antiviral peptides (AVPs) | Balanced coefficients | Interaction domain                 | Total interactions | Side-chain amino acid residues interacting with AVPs | Side-chain amino acid residues interacting with receptor | Sub-domains of interaction                     |
|---------------------------|-----------------------|------------------------------------|--------------------|------------------------------------------------------|----------------------------------------------------------|------------------------------------------------|
| N1LB-HA                   | -499.3                | Membrane-proximal                  | 162                | 12/15                                                | 19                                                       | F', Helix A                                    |
| N2LB-HA                   | -649.3                | Membrane-distal                    | 106                | 13/16                                                | 19                                                       | Helix A, Loop B, VES, RSB'                     |
| N3LB-HA                   | -673.0                | Membrane-proximal                  | 73                 | 7/15                                                 | 10                                                       | F', Helix A                                    |
| C1LB-HA                   | -704.0                | Membrane- distal                   | 162                | 11/18                                                | 24                                                       | VES, RBS, Loop B, Helix B                      |
| C2LB-HA                   | -646.0                | Insert into membrane distal spaces | 208                | 12/12                                                | 14                                                       | Helix B, RBS, Loop B, VES, VES', Loop B', RBS' |
| C3LB-HA                   | -532.6                | Membrane-proximal                  | 101                | 9/16                                                 | 13                                                       | Helix B, F'                                    |

\*Target influenza A HA (3LZG). The complex in PDB files generated with ClusPro server were visualized and analyzed with Chimera v1.6rc and VMD v1.9 programs. F'= fusion subdomain, VES= Vestigial Esterase Subdomain, RBS= Receptor Binding Subdomain, Loop B= Subdomain connecting Helix A and Helix B of HA2 subunit, Helix A = Subdomain of HA2 subunit, Helix B =Subdomain of HA2 subunit.
